# Supplementary material for: Predicting the risk of sarcopenia in elderly patients with patellar fracture: development and assessment of a new predictive nomogram
Source: PeerJ. 2020 Apr 15;8:e8793. doi: 10.7717/peerj.8793 (PMC7166043; doi:10.7717/peerj.8793)
Supplement: Supplemental Information 1 [file peerj-08-8793-s001.xls]

## Sheet: raw data
CID	ID	status	gender	age	education_level	length_of_hospital_stay	surgical_technique	bone_ununion	open_fracture	multiple_fracture	infection	AO_classification_of_fracture	weight	height	BMI	rehabilitation_training	diabetes	high_blood_pressure	hyperlipidemia	exercise	renal_insufficiency	drink	smoke	internal_fixation_removal	blood_type	history_of_stroke_or_myocardial_infarction	heart_disease	cancer	asthma	treatment_group	perioperative_blood_transfusion	follow-up_time
1112508	132	0	0	55	1	21	0	0	0	1	1	Upper or lower pole	67	167	24	0	0	0	0	1	0	0	0	1	B	0	0	0	0	1	0	5.75
1114110	71	0	0	55	0	12	1	0	0	0	0	Upper or lower pole	69	158	27.6	0	0	0	1	1	0	1	1	1	B	0	0	0	1	1	0	5.75
1258405	135	0	0	55	2	15	0	0	0	1	0	Comminuted fracture	78	164	29	1	0	1	1	1	0	1	1	0	B	0	1	0	0	1	0	3.16667
1342686	123	0	0	55	2	10	0	0	0	0	0	Transverse	62	169	21.7	0	1	0	0	1	0	1	0	0	O	0	0	0	0	1	0	1.83333
1208652	96	0	0	56	1	7	0	0	0	0	0	Upper or lower pole	55	169	19.2	1	0	0	0	1	0	1	1	0	B	0	0	0	0	1	0	4
1117614	73	0	0	57	2	11	0	0	0	0	0	Transverse	70	170	24.2	1	1	0	0	1	0	1	0	1	A	0	0	0	0	1	0	5.75
1328762	16	0	0	57	1	7	0	0	0	0	0	Vertical fracture	73	164	27.2	1	0	0	1	1	0	0	0	1	A	0	0	0	0	0	0	2
1332557	118	0	0	57	2	11	0	0	0	0	0	Transverse	62	168	21.9	0	1	0	1	1	0	1	1	1	O	0	0	0	0	1	0	2
1217920	97	0	0	58	1	9	0	0	0	0	0	Transverse	70	167	25	0	1	0	1	1	0	1	0	1	O	0	0	0	0	1	0	3.83333
1115144	72	0	0	59	1	5	0	0	0	0	0	Upper or lower pole	70	164	26	0	0	0	0	1	0	0	0	0	A	0	0	0	0	1	0	5.75
1156209	83	0	0	59	2	14	0	0	0	0	0	Upper or lower pole	79	161	30.4	1	0	1	0	1	0	0	0	0	B	0	0	0	0	1	0	4.91667
1097594	64	0	0	60	1	9	0	0	0	0	0	Transverse	71	167	25.4	1	0	0	0	1	0	0	0	0	AB	0	0	0	0	1	0	6.16667
1239991	9	0	0	60	2	10	1	0	0	0	0	Transverse	80	161	30.7	0	0	1	1	1	0	1	1	1	A	0	0	0	0	0	0	4.25
1283498	109	0	0	61	1	10	0	0	0	0	0	Upper or lower pole	78	166	28.3	0	1	0	1	0	0	1	1	0	B	0	0	0	0	1	0	2.75
1134161	2	0	0	62	2	10	0	0	0	0	0	Transverse	63	168	22.2	0	0	0	0	1	0	0	1	1	A	0	0	0	0	0	0	6.25
1102443	65	0	0	63	2	6	0	0	0	0	0	Upper or lower pole	71	167	25.4	1	0	1	0	1	0	0	1	0	A	0	0	0	0	1	0	6
1150455	4	0	0	63	2	25	0	1	1	0	1	Transverse	70	167	25.2	1	0	0	0	1	0	1	1	1	AB	0	0	0	0	0	0	5.08333
1131404	1	0	0	64	1	10	0	0	0	0	0	Comminuted fracture	65	157	26.3	1	0	1	1	1	0	1	1	1	A	0	0	0	0	0	0	6.25
1310910	14	0	0	65	1	11	0	0	0	0	0	Upper or lower pole	62	169	21.8	0	1	1	0	1	0	1	1	1	B	0	0	0	0	0	0	3.25
1394612	20	0	0	65	1	19	0	0	1	0	0	Upper or lower pole	73	157	29.8	1	0	0	1	1	0	1	1	1	O	0	1	0	0	0	0	1
1174323	6	0	0	66	1	16	1	0	0	0	0	Upper or lower pole	69	152	29.7	0	0	1	1	0	0	1	1	0	B	0	0	1	0	0	0	4.58333
1280273	12	0	0	66	2	13	0	0	0	0	0	Vertical fracture	71	156	29.2	1	0	0	0	1	0	0	0	0	A	0	0	0	0	0	0	2.83333
1339752	122	0	0	66	1	14	0	0	0	0	0	Transverse	70	152	30.2	1	1	0	1	1	0	1	1	1	B	0	0	0	0	1	0	1.83333
1142009	3	0	0	67	2	6	0	0	0	0	0	Upper or lower pole	72	170	25	1	0	0	1	1	0	1	1	0	B	0	0	0	0	0	0	5.25
1377364	19	0	0	69	1	25	0	0	0	0	0	Transverse	71	167	25.5	1	1	0	0	1	0	1	0	0	A	0	0	0	0	0	0	1.25
1152865	5	0	0	71	1	9	0	0	0	0	0	Comminuted fracture	66	162	25.2	0	1	0	1	1	0	1	0	0	A	0	0	0	0	0	0	5
1261871	103	0	0	71	2	8	0	0	0	0	0	Upper or lower pole	69	156	28.3	0	0	0	0	1	0	0	0	0	A	0	0	0	0	1	0	3.08333
1195203	7	0	0	72	1	9	0	0	0	0	0	Upper or lower pole	78	166	28.2	0	0	1	0	1	0	1	1	0	A	0	0	0	0	0	0	4.25
1275663	105	0	0	79	0	8	0	0	0	0	0	Upper or lower pole	63	157	25.5	1	0	0	0	1	0	1	1	0	B	0	0	0	0	1	0	2.91667
1279464	108	0	0	80	1	4	0	0	0	0	0	Comminuted fracture	66	162	25.1	0	0	0	0	1	0	0	0	0	A	0	0	0	0	1	0	2.83333
1306126	13	0	0	89	1	4	0	0	0	0	0	Transverse	56	169	19.5	0	0	1	0	1	0	1	0	1	A	0	0	0	0	0	0	3.25
1105651	67	0	1	55	2	8	0	0	0	0	1	Upper or lower pole	60	158	24	1	1	0	1	1	0	0	0	0	A	0	0	0	0	1	0	6
1278375	106	0	1	55	1	8	0	0	0	0	0	Transverse	80	189	22.3	1	0	0	0	0	0	0	0	1	O	0	0	0	0	1	0	2.83333
1302781	112	0	1	55	0	8	0	0	0	0	0	Transverse	46	152	19.9	0	0	0	0	1	0	0	0	1	B	0	0	0	0	1	0	3.25
1113717	70	0	1	56	0	12	0	0	0	0	0	Upper or lower pole	51	154	21.5	1	0	0	0	1	0	0	0	1	A	0	0	0	0	1	0	5.75
1118258	74	0	1	56	0	10	0	0	0	0	0	Upper or lower pole	63	154	26.5	1	0	0	0	1	0	1	0	0	B	0	0	0	0	1	0	5.66667
1180428	90	0	1	56	0	12	0	0	0	0	0	Transverse	67	161	25.8	1	0	0	1	0	0	1	1	1	B	0	1	0	0	1	0	5.25
1226510	134	0	1	56	0	3	2	0	0	0	0	Vertical fracture	48	152	20.7	0	0	0	0	1	0	0	1	1	AB	0	0	0	0	1	0	3.75
1226983	99	0	1	57	0	20	0	0	0	0	0	Upper or lower pole	66	165	24.2	0	0	0	0	1	0	1	0	0	AB	0	0	0	0	1	0	3.66667
1111239	69	0	1	58	0	13	0	0	0	0	0	Transverse	76	175	24.8	0	0	0	0	1	0	0	1	0	A	0	1	0	0	1	0	5.83333
1184621	92	0	1	58	1	8	0	0	0	0	0	Transverse	70	164	26	1	0	0	0	1	0	1	0	1	O	0	0	0	0	1	0	5.25
1256478	101	0	1	58	1	11	0	0	0	0	0	Transverse	67	157	27.1	1	0	0	1	1	0	0	0	1	O	0	0	0	0	1	0	3.16667
1359575	125	0	1	58	1	13	0	0	0	0	0	Upper or lower pole	57	170	19.7	0	0	0	0	0	0	0	0	0	A	0	0	0	0	1	0	1.58333
1368393	126	0	1	58	1	8	0	0	0	0	0	Upper or lower pole	63	154	26.5	0	0	0	0	1	0	0	0	0	AB	0	0	0	0	1	0	2.25
1380532	129	0	1	58	1	9	0	0	0	0	0	Transverse	66	165	24.2	1	0	0	0	1	0	0	0	1	B	0	0	0	0	1	0	1.25
1094537	62	0	1	59	1	10	0	0	0	0	0	Undisplaced	57	170	19.7	0	1	0	0	0	0	0	0	1	A	0	0	0	0	1	0	6.25
1290491	43	0	1	59	1	8	0	0	0	0	0	Comminuted fracture	61	159	24	0	0	0	0	1	0	0	0	0	B	0	0	0	0	0	0	2.66667
1310912	46	0	1	59	0	13	0	0	0	0	0	Comminuted fracture	48	142	23.8	0	1	0	0	1	0	0	0	1	B	0	0	0	0	0	0	3.25
1305197	113	0	1	60	1	14	0	0	0	0	0	Transverse	56	151	24.5	1	0	0	0	1	0	0	0	1	B	0	0	0	0	1	0	3.25
1307663	115	0	1	60	0	4	0	0	0	0	0	Transverse	55	157	22.3	1	0	0	0	0	0	0	1	0	B	0	1	0	0	1	0	3.25
1309798	116	0	1	60	1	11	0	0	0	0	0	Transverse	48	166	17.4	0	0	0	0	1	0	0	0	0	O	0	0	0	0	1	0	3.25
1326688	117	0	1	60	1	6	0	0	0	0	0	Upper or lower pole	70	182	21.1	1	1	0	0	1	0	0	0	0	O	0	0	0	0	1	0	2.08333
1378636	56	0	1	60	2	14	0	0	0	0	0	Transverse	41	148	21.5	1	0	1	0	1	0	0	0	1	O	0	0	0	0	0	0	1.25
1381811	57	0	1	60	2	19	0	0	0	0	0	Comminuted fracture	63	160	24.5	0	1	0	1	1	0	0	0	0	B	0	0	0	0	0	0	1.25
1403349	60	0	1	60	1	7	0	0	0	0	0	Comminuted fracture	66	151	28.9	0	0	1	0	1	0	0	0	0	O	0	1	0	0	0	0	0.916667
1106744	68	0	1	61	2	10	1	0	0	0	0	Transverse	55	160	21.4	0	1	0	0	1	0	1	0	0	AB	0	0	0	0	1	0	5.91667
1230651	39	0	1	61	2	6	0	0	0	0	0	Upper or lower pole	57	164	21	1	0	1	0	1	0	0	0	1	A	0	0	0	0	0	0	3.66667
1139721	25	0	1	62	2	7	0	0	0	0	0	Comminuted fracture	60	149	26.9	0	1	0	0	1	0	0	1	0	B	0	1	0	0	0	0	5.25
1140012	26	0	1	62	1	5	0	0	0	0	0	Vertical fracture	43	143	21	1	0	0	0	1	0	1	0	1	B	0	0	0	0	0	0	5.25
1159860	86	0	1	62	1	13	0	0	0	0	0	Comminuted fracture	71	177	22.6	1	0	0	0	0	0	1	0	0	A	0	0	0	0	1	0	4.91667
1265474	40	0	1	62	1	10	0	0	0	0	0	Upper or lower pole	63	156	25.7	0	0	1	0	1	0	0	0	0	O	0	0	0	0	0	0	3.08333
1288688	110	0	1	62	1	11	0	0	0	0	0	Transverse	52	159	20.5	0	1	0	0	1	0	1	0	0	A	0	0	0	0	1	0	2.66667
1338560	48	0	1	62	0	7	0	0	0	0	0	Upper or lower pole	48	141	24.1	0	1	0	0	1	0	1	0	1	O	0	0	0	0	0	0	1.91667
1340350	49	0	1	62	2	5	0	0	0	0	0	Undisplaced	60	152	25.9	1	0	1	0	1	0	1	1	0	A	0	1	0	0	0	0	1.83333
1386510	58	0	1	62	1	8	0	0	0	0	0	Upper or lower pole	70	156	28.5	1	0	0	0	1	0	0	0	0	AB	0	0	0	0	0	0	1.16667
1168707	30	0	1	63	1	8	1	0	0	0	0	Undisplaced	56	140	28.3	0	0	1	0	1	0	0	0	1	O	0	0	0	0	0	0	4.75
1265051	104	0	1	63	2	26	0	0	0	1	0	Transverse	55	155	22.8	1	0	0	0	1	0	0	0	0	O	0	0	0	0	1	0	3
1172916	31	0	1	64	1	7	1	0	0	0	0	Transverse	67	157	26.9	1	0	1	0	1	0	1	0	0	O	0	0	0	0	0	0	4.66667
1294716	111	0	1	64	1	5	0	0	0	0	0	Transverse	50	140	25.5	0	0	0	1	0	0	1	0	0	A	0	0	0	0	1	0	2.58333
1389678	59	0	1	64	1	12	0	0	0	0	0	Transverse	66	154	27.6	0	0	0	0	1	0	0	0	0	O	0	0	0	0	0	0	1.08333
1122145	21	0	1	66	2	5	0	0	0	0	0	Transverse	67	166	24.3	1	0	1	1	0	0	0	0	1	O	0	0	0	0	0	0	5.66667
1128058	79	0	1	66	1	10	0	0	0	0	0	Transverse	58	166	21	0	1	0	0	1	0	0	0	0	B	0	0	0	1	1	0	6.25
1180306	89	0	1	66	2	14	0	0	0	1	0	Upper or lower pole	60	168	21.2	0	0	0	0	0	0	0	0	0	A	0	0	0	0	1	0	5.25
1201652	35	0	1	66	1	5	0	0	0	0	0	Upper or lower pole	76	176	24.4	0	1	1	1	0	0	1	0	1	O	0	0	0	0	0	0	4.16667
1247306	100	0	1	66	1	9	0	0	0	0	0	Upper or lower pole	55	157	22.3	1	1	0	0	1	0	0	0	0	B	0	0	0	0	1	0	4.25
1339748	121	0	1	66	2	7	0	0	0	0	0	Transverse	61	178	19.2	1	0	0	0	1	0	0	0	0	O	0	0	0	0	1	0	1.83333
1349370	124	0	1	67	1	7	0	0	0	0	0	Transverse	80	159	31.6	1	1	1	1	0	0	1	0	1	B	0	0	0	0	1	0	1.75
1408808	131	0	1	67	1	10	0	0	0	0	0	Upper or lower pole	61	178	19.2	1	1	0	0	1	0	0	0	1	B	0	0	0	0	1	0	0.833333
1143921	28	0	1	68	1	10	0	0	0	0	0	Transverse	52	141	25.8	0	0	0	0	0	0	0	0	0	B	0	0	0	0	0	0	5.16667
1217146	37	0	1	68	0	9	0	0	0	0	0	Transverse	55	155	23	1	0	0	0	0	0	0	0	0	A	0	0	0	0	0	0	3.83333
1162017	29	0	1	70	1	14	1	0	1	0	0	Upper or lower pole	70	148	31.8	0	0	0	1	0	0	0	0	1	A	1	0	0	1	0	0	4.83333
1377411	128	0	1	70	2	11	0	0	0	0	0	Undisplaced	63	152	27.2	0	0	0	1	1	0	1	0	1	O	1	0	0	0	1	0	1.25
1365687	54	0	1	72	2	11	0	0	0	0	0	Comminuted fracture	55	146	27	1	0	1	0	1	0	0	0	0	AB	0	0	0	0	0	0	2.25
1130942	23	0	1	73	1	8	0	0	0	0	0	Transverse	66	151	29	0	0	0	0	1	0	0	0	0	O	0	0	0	0	0	0	6.25
1131405	24	0	1	73	0	7	0	0	0	0	0	Transverse	50	147	23	1	0	1	1	1	0	1	0	1	A	0	0	0	0	0	0	6.25
1169608	87	0	1	73	1	14	0	0	0	0	0	Upper or lower pole	58	167	20.7	0	0	0	0	1	0	0	0	0	O	0	0	1	0	1	0	4.75
1319040	47	0	1	74	2	14	0	0	0	0	0	Transverse	80	179	25	1	0	0	0	1	0	0	0	0	A	0	0	0	0	0	0	2.16667
1178479	34	0	1	75	1	11	0	0	0	0	0	Comminuted fracture	71	163	26.7	1	0	1	0	1	0	0	0	0	A	0	0	0	0	0	0	4.58333
1306143	114	0	1	75	2	10	0	0	0	0	0	Undisplaced	66	158	26.4	0	0	0	0	1	0	0	0	0	B	0	0	0	0	1	0	3.25
1124004	22	0	1	77	0	9	0	0	0	0	0	Transverse	58	158	23.3	1	0	0	1	0	0	1	0	0	O	0	0	0	0	0	0	5.58333
1351286	52	0	1	78	0	7	0	0	0	0	0	Upper or lower pole	58	150	25.7	0	0	0	0	1	0	0	0	0	A	0	0	0	0	0	0	1.66667
1290430	42	0	1	90	1	9	0	0	0	0	0	Comminuted fracture	55	147	25.5	0	1	0	0	1	0	0	0	0	B	1	0	0	0	0	0	2.66667
1397633	130	1	0	55	2	6	0	0	0	0	0	Upper or lower pole	67	159	26.5	0	1	1	1	1	0	1	1	1	A	0	0	0	0	1	0	1
1096602	63	1	0	59	1	11	1	0	0	0	0	Upper or lower pole	55	143	26.8	1	0	1	1	1	0	0	0	0	B	0	0	0	0	1	0	6.16667
1319677	15	1	0	59	1	6	0	0	0	0	0	Transverse	62	153	26.6	1	1	0	1	0	0	0	1	1	AB	0	0	0	0	0	0	2.16667
1359704	18	1	0	59	2	24	0	0	0	1	1	Comminuted fracture	70	177	22.5	1	1	0	0	0	0	0	1	0	B	0	0	0	0	0	0	1.58333
1145268	81	1	0	60	2	18	0	0	1	0	1	Upper or lower pole	58	177	18.5	1	1	0	0	0	0	0	1	0	O	0	0	0	0	1	0	5.08333
1148735	82	1	0	60	2	20	0	1	1	0	1	Transverse	70	177	22.3	0	1	1	1	1	0	1	0	1	B	0	0	0	0	1	0	5.08333
1278395	107	1	0	62	1	7	0	0	0	0	0	Transverse	58	176	18.7	1	0	0	0	1	0	0	1	0	O	0	0	0	0	1	0	2.83333
1127466	78	1	0	64	1	9	0	0	0	0	0	Comminuted fracture	62	153	26.4	1	0	0	0	0	0	0	1	1	B	0	0	0	1	1	0	6.25
1156686	84	1	0	67	2	10	0	0	0	0	0	Upper or lower pole	55	164	20.4	0	1	0	0	0	0	0	0	0	B	0	0	0	0	1	0	4.91667
1195734	94	1	0	67	0	11	0	0	0	0	0	Comminuted fracture	59	161	22.7	0	1	1	0	0	0	0	1	0	AB	0	0	0	0	1	0	4.25
1358306	136	1	0	68	1	4	2	0	0	0	0	Vertical fracture	50	167	17.9	0	0	0	0	0	0	0	0	1	B	0	0	0	0	1	0	1.58333
1232848	8	1	0	69	1	12	0	0	0	0	0	Upper or lower pole	65	171	22.3	1	1	1	0	1	0	1	0	0	B	0	0	0	0	0	0	3.58333
1253201	11	1	0	69	1	14	0	0	0	0	0	Transverse	60	185	17.4663	1	0	0	0	1	0	0	1	1	O	0	0	0	0	0	0	3.25
1158219	85	1	0	71	1	14	0	0	0	0	0	Transverse	50	165	18.3	1	1	0	0	1	0	0	1	0	O	0	0	0	0	1	0	4.91667
1329822	17	1	0	71	2	16	0	0	0	0	0	Transverse	60	155	25	1	0	1	0	1	0	0	1	0	A	0	1	0	0	0	0	2
1125446	76	1	0	72	1	20	0	0	1	0	0	Comminuted fracture	60	175	19.5	1	0	0	0	1	0	0	1	0	B	1	1	0	0	1	0	6.25
1192236	93	1	0	80	0	9	0	0	0	0	0	Comminuted fracture	64	163	24	1	0	1	1	0	0	0	0	0	O	0	0	0	1	1	0	5.25
1258343	102	1	0	82	1	10	0	0	0	0	0	Transverse	60	174	19.8	1	0	1	0	1	0	0	1	0	O	0	1	0	0	1	0	3.16667
1184471	91	1	0	85	1	18	0	0	0	0	0	Transverse	65	171	22.2	1	1	0	0	1	0	0	0	0	B	0	0	0	0	1	0	5.25
1139268	80	1	0	87	1	10	0	0	0	0	0	Comminuted fracture	52	156	21.3	0	0	0	0	0	0	0	1	0	O	0	0	0	0	1	0	5.25
1250859	10	1	0	88	0	10	0	0	0	0	0	Comminuted fracture	58	177	18.6	1	1	1	0	1	0	0	1	1	B	0	0	0	0	0	0	4.25
1223034	98	1	1	55	2	10	0	0	0	0	0	Upper or lower pole	65	171	22.2	1	1	0	0	1	0	1	0	0	AB	1	0	0	0	1	0	3.75
1174656	88	1	1	57	2	23	0	0	1	0	1	Transverse	67	159	26.5	1	0	1	1	1	0	0	1	1	A	0	0	0	0	1	0	4.58333
1124291	75	1	1	59	1	15	0	0	1	0	0	Transverse	62	156	25.4	1	1	0	1	0	0	0	0	1	AB	0	0	0	0	1	0	5.58333
1370529	55	1	1	59	0	11	0	0	0	0	0	Upper or lower pole	66	178	20.6	1	1	0	1	0	0	0	0	1	A	0	0	0	0	0	0	2.25
1215301	133	1	1	60	1	3	0	1	0	0	0	Upper or lower pole	58	176	18.7	0	0	0	0	0	0	0	0	0	O	0	0	0	0	1	0	3.91667
1378666	137	1	1	61	1	4	2	0	0	0	0	Vertical fracture	48	159	18.9	1	1	1	0	0	0	0	0	0	O	0	0	0	0	1	0	1.25
1105585	66	1	1	63	0	7	1	0	0	0	0	Upper or lower pole	50	145	23.7	0	0	0	0	1	0	1	0	1	B	0	0	0	0	1	0	6
1177969	33	1	1	63	1	12	1	0	0	0	0	Upper or lower pole	55	149	24.5	1	1	0	0	1	0	0	0	0	O	0	0	0	0	0	0	4.58333
1282220	41	1	1	63	1	3	1	0	0	0	0	Transverse	67	159	26.4	0	0	0	1	1	0	0	0	0	A	0	0	0	0	0	0	2.75
1215301	36	1	1	64	1	3	0	0	0	0	0	Upper or lower pole	64	163	23.9	1	0	0	1	0	0	0	0	1	O	0	0	0	0	0	0	3.91667
1126256	77	1	1	66	1	13	0	0	0	0	0	Comminuted fracture	55	154	23.1	1	1	0	0	1	0	1	0	0	A	0	0	0	0	1	0	6.25
1349859	51	1	1	67	2	14	0	0	0	1	0	Transverse	50	145	23.5	0	0	0	1	0	0	0	0	0	B	0	0	0	0	0	0	1.66667
1202763	95	1	1	69	1	5	0	0	0	0	0	Upper or lower pole	66	178	20.8	1	0	0	0	0	0	0	0	0	A	0	0	0	0	1	0	4.08333
1142820	27	1	1	71	0	9	0	0	0	0	0	Upper or lower pole	50	157	20.2	0	0	0	0	0	0	0	0	0	O	0	0	0	0	0	0	5.25
1351467	53	1	1	71	1	9	0	0	0	0	0	Comminuted fracture	43	145	20.5	1	1	1	0	1	0	0	0	0	B	0	0	0	0	0	0	1.66667
1298657	44	1	1	72	1	10	0	0	0	0	0	Upper or lower pole	55	154	23.2	1	0	1	0	1	0	1	0	0	B	0	0	0	0	0	0	3.25
1332856	119	1	1	75	2	6	0	0	0	0	0	Upper or lower pole	58	177	18.5	1	1	0	0	0	0	0	0	0	A	0	0	0	0	1	0	2
1227390	38	1	1	76	1	8	0	0	0	0	0	Upper or lower pole	58	176	18.7	1	0	0	0	1	0	0	0	0	A	1	0	1	0	0	0	3.66667
1405480	61	1	1	77	0	9	0	0	0	0	0	Transverse	48	140	24.4	1	1	1	0	1	0	0	0	0	A	0	1	0	0	0	0	0.833333
1343665	50	1	1	79	0	11	0	0	0	0	0	Transverse	52	148	23.9	1	1	0	0	0	0	0	0	0	A	0	0	0	0	0	0	1.83333
1298717	45	1	1	80	0	9	0	0	0	0	0	Comminuted fracture	52	156	21.4	0	1	0	1	0	0	0	0	0	A	0	1	0	0	0	0	3.25
1332881	120	1	1	85	2	7	0	0	0	0	0	Comminuted fracture	43	145	20.4	1	0	0	0	1	1	1	0	0	O	0	1	0	0	1	0	2
1176115	32	1	1	86	0	10	0	0	0	0	0	Upper or lower pole	59	161	22.8	0	0	1	0	0	0	1	0	1	O	0	0	0	0	0	0	4.58333
1375080	127	1	1	88	1	10	0	0	0	0	0	Transverse	52	148	23.7	1	1	0	0	1	0	0	0	0	B	1	0	0	0	1	0	2.25
